1 **Seasonality of food availability influences dietary patterns in two**  
2 **farming districts of Malawi**

3

4

5 **Tiyezge Ruth Zimba** <sup>1\*</sup>, **Agnes Mbach** <sup>2</sup>, **Beatrice Mtimuni** <sup>1</sup>, **Prisca Waluza**  
6 **Chisala**<sup>1</sup>

7

8

9

10 **1** Department of Human Nutrition and Health, Lilongwe University of Agriculture and Natural  
11 Resources, P.O. Box 219, Lilongwe, Malawi

12 **2** Department of Food Science and technology, Lilongwe University of Agriculture and Natural  
13 Resources, P.O. Box 219, Lilongwe, Malawi,

14

15

16 \*Corresponding Author

17 E-mail: [tiyezge.zimba@gmail.com](mailto:tiyezge.zimba@gmail.com) (TR)

## 18 **1.0 Introduction**

19 In most rural areas Africa, farm households rely on their own food production or local open  
20 markets for food. Seasonal variations in food availability are characteristic in such areas due to  
21 poor food distribution/system infrastructure. Such variability in food availability sometimes  
22 results in a food and health crisis that ruins and kills Africans every year, but its severity and  
23 duration vary across households and over time [1]. The situation is exacerbated by the rain-fed  
24 farming systems, where smallholder farmers depend on a single rainy season for most of their  
25 staple food needs. Rain-fed agriculture is dependent on the unpredictable behavior of the weather  
26 conditions in the context of climate change [1]. Poor rain performance, directly affects household  
27 food and livelihood security, because it affects yield, which in turn is linked to household food  
28 consumption and household cash income [2].

29 In Malawi, food shortages tend to be seasonal, mainly because the vast majority (>84%) of the  
30 smallholder farmers depend on rain-fed agriculture and have small land holding sizes (average of  
31 < 1.12 hectare) [3]. Seasonal variations in food prices characterized by lowest grain prices around  
32 harvest time and steady rise through the dry season until the next harvest also creates vulnerability  
33 for the 42% and 82% rural and urban poor Malawians respectively who rely on buying their food  
34 from markets [4]. Rural poor farmers are the most vulnerable to seasonal variations in food  
35 availability [5]. Many of these famers depend on agriculture for subsistence and income and have  
36 limited access to land, financial resources, and farm inputs [1].

37 Food availability and accessibility have been reported to affect diet pattern. A study in Texas  
38 explored social and environmental influences on children's diets using focus group discussions  
39 and they found that availability, accessibility, television, peer and parent influences influenced

40 consumption of fruits, juices, vegetables and low fat foods [6]. Another study which aimed to  
41 evaluate the relationship between the home food environment and Hispanic children's diet quality,  
42 found that home food availability, parental diet and family eating habits were associated with the  
43 diet quality of Hispanic children [7].

44 Seasonal food shortages are a common cause of malnutrition among infants [8]. Anecdote  
45 evidence showed that the admission pattern of undernourished children to nutrition rehabilitation  
46 units in Malawi followed the trend of food scarcity. Most admissions of severely undernourished  
47 children to nutrition rehabilitation units in Malawi occurs during the months of January to  
48 February, and similarly the highest number of children are admitted to the supplementary feeding  
49 or outpatient therapeutic programs during these months [9].

50 Adequate nutrition is critical for optimal growth, health and cognitive development of infants.  
51 Complementary feeding which starts when breast milk alone is no longer sufficient to meet the  
52 nutritional requirements of infants is essential from 6 to 23 months of age. However,  
53 complementary feeding in rural areas is highly affected by seasonality of food supplies. Seasonal  
54 availability and access to different foods were identified among constraints to successful infant  
55 and young child feeding (IYCF) interventions by WHO/UNICEF [8]. To address malnutrition,  
56 household guidance on recipes based on seasonal food availability has proved to be essential [10].

57 In Malawi, there is limited dietary diversification due to lack of understanding of food values, poor  
58 choices and feeding practices [11]. High incidence of nutrition-related diseases in infants occur  
59 during the critical weaning period between 6 months and one year of age in rural areas of Malawi,  
60 attributed to inappropriate infant weaning practices [12].

61 Child undernutrition is one of the big challenges in Malawi and 37% of the under-five children are  
62 stunted [13]. The high stunting levels for under-five children in Malawi led to the Malawi  
63 government to put in place a number of strategies to combat child malnutrition. One of such  
64 strategies is improving women's nutrition and care before, during and after pregnancy and ensure  
65 the consumption of a diversified diet made with foods from the six food groups. This study aimed  
66 to determine the seasonal food availability patterns in Dedza and Balaka for the development of  
67 seasonal food availability calendar (SFAC) as one of the nutrition interventions to reduce stunting  
68 in Malawi. SFAC is one of the tools that can be used to raise awareness to recurring food shortages  
69 and helps in developing seasonal complementary food recipes [8].

70

71 The study also aimed to determine seasonal variation in the dietary patterns of pregnant women,  
72 lactating women and children aged between 12 and 23 months. The first 1000 days of human life,  
73 from conception to the age of 2 years, are a critical stage when vital organs such as the brain and  
74 its interconnections with the rest of the body are formed and there is rapid growth and development  
75 [14]. Extended periods of insufficient nutrient intake for a child during this period can result in  
76 permanent damage through stunting [15]. Therefore, the study drew associations between seasonal  
77 food availability and dietary patterns of pregnant women, lactating women and children aged  
78 between 12 and 23 months.

## 79 **2.0 Materials and Methods**

### 80 **2.1 Study area and seasons**

81 The study was conducted in Dedza and Balaka districts, Central and Southern Malawi respectively  
82 (Figure 1) during March to December 2015. Dedza has 10 Extension Planning Areas (EPAs) with

83 169 sections and 197, 492 farming families and Balaka has 6 EPAs consisting of 83 sections with  
84 125, 444 farming families (Ministry of Agriculture and Food Security, 2013). Data were collected  
85 in four quarters (March, June, September and December). The seasons in this study were divided  
86 into three following Malawi meteorology department description i.e. Warm wet season (November  
87 to April), cool dry winter season (May to August) and hot dry season (September to October) [16].  
88

## 89 2.2 Study design and study population

90 The study was cross sectional employing both qualitative and quantitative data collection methods.  
91 The population comprised of pregnant or lactating women and children aged between 12 and 23  
92 months living in 10 EPAs of Dedza and 6 EPAs of Balaka during March to December 2015. The  
93 study protocol was reviewed and approved by the Faculty of Food and Human Sciences at  
94 LUANAR. Permission to conduct the study was sought from Dedza and Balaka District  
95 Commissioner and from Dedza and Balaka District Agricultural Development Officers. Written  
96 and thumb-printed informed consent was also obtained from the participants.  
97

## 98 2.3 Sampling of participants and data collection methods

### 99 *Household survey*

100 The study population was separated into mutually exclusive, homogeneous Extension Planning  
101 Areas (EPAs), thus 10 EPAs in Dedza and 6 EPAs in Balaka. A two stage stratified sampling  
102 technique was used. First proportional probability sampling was used to randomly sample five  
103 EPAs from the two districts that is; three EPAs (Kabwazi, Linthipe and Bembeke) in Dedza and  
104 two (Mpilisi and Bazale) EPAs in Balaka (Figure 1). Then purposive sampling technique was

105 used to sample households. Sample size of 160 households with pregnant or lactating women and  
106 or children aged between 12 and 23 months was used targeting 32 households in each of the 5  
107 EPAs.

108 Household survey was used to collected information on dietary patterns and household seasonal  
109 food availability. The interviewees included pregnant or, lactating women and mothers of children  
110 aged between 12 and 23 months. Due to limited number of children who were eligible throughout  
111 the study, all children who were at least within the eligible age group were recruited. A participant  
112 was replaced if a household had moved from the area or if the child was no longer within the  
113 eligible age range. In the case where a registered pregnant woman gave birth, they were moved to  
114 the lactating group. A Semi-structured questionnaire was used to collect data on seasonal  
115 availability of foods and a 179 item Food frequency questionnaire validated by a food record was  
116 used to determine the dietary patterns. The reference time period for the FFQ was a month and  
117 the response categories included; daily, weekly or monthly consumption of food items.

#### 118 *Focus group discussions*

119 The participants were selected purposively by targeting 6 to 15 women who were either pregnant,  
120 lactating or had children aged between 12 and 23 months from different villages within an EPA in  
121 all the 16 EPAs. Focus group discussion participants were not involved in the household survey  
122 and data was collected from the same participants in all the four quarters. The discussions were  
123 guided by a checklist to collect information on available food with the aid of audio voice recorders.

## 124 2.4 Data analysis

125 Principal component analysis (PCA) was used to identify the diet patterns captured using a 179  
126 item FFQ and the data was analyzed using SPSS Version 20. Applicability of factor analysis was

127 verified by Kaiser-Meyer-Olkin (KMO) measurement of adequacy. The presence of correlations  
128 between food groups was tested using the Bartlett test of sphericity and was accepted when it was  
129 significant at  $p < 0.05$ . Varimax rotation was used to extract the factors, Eigen value of  $> 1.0$  was  
130 used to decide the number of components to return and total variance explained indicated how  
131 much of the variability in the data was modeled by the extracted factors.

132 The audio data captured by an audio recorder was transcribed verbatim into written words  
133 manually, using Microsoft word. The typed interview transcripts were laid out on left half of the  
134 page while keeping the right half margin for writing the codes and notes. The transcript was made  
135 anonymous by tagging each voice (e.g. voice A, voice B) to distinguish multiple voices. Coding  
136 was done by making notes in the right margin adjacent to each line paragraph. Apart from that,  
137 significant participant's quotes worthy of attention were highlighted. The codes from all the  
138 transcripts were drawn together to come up with themes.

139 Association between food availability and diet pattern were derived by dividing total number of  
140 all foods in the diet with total number of food which were shown to be adequate or scarce and  
141 multiplying that number with one hundred. Associations then were drawn by looking at the  
142 percentage level of availability of the foods that were in the diet.

143

### 144 **3.0 Results and Discussions**

145 Most of the participants were young married mothers, who had dropped out of primary school and  
146 earned their income through farming (Table 1). Only 31% of girls in Malawi complete primary  
147 school and 11% graduate from secondary school, such that one in three of the Malawian girls  
148 marry and/or experience at least one pregnancy before her 20<sup>th</sup> birthday [18]. Maternal education  
149 has often been associated with positive child health and nutritional outcomes. In Haiti, maternal

150 education was associated with greater dietary diversity in young children’s diets [19]. Considering  
 151 that 64.5% of the participants in this study did not finish primary school, this may likely affect the  
 152 way they accept and adhere to nutrition messages.

153

154 **Table 1: Demographic characteristics of household survey respondents**

| <b>Characteristics</b>                            | <b>Balaka (n=62)</b> | <b>Dedza (n=96)</b> |
|---------------------------------------------------|----------------------|---------------------|
| Age*                                              | 25.9±7.7             | 24.9±5.0            |
| Household size*                                   | 4.6±1.7              | 4.2±1.3             |
| Number of <5 children in the household*           | 1.3±0.7              | 1.3±0.7             |
| <b>Marital status (%)</b>                         |                      |                     |
| Single                                            | 8 (12.9%)            | 11 (11.5%)          |
| Married                                           | 53 (85.5%)           | 85 (88.5%)          |
| Widowed                                           | 1 (1.6%)             | 0                   |
| <b>Pregnancy</b>                                  |                      |                     |
| First trimester                                   | 0                    | 2 (2.1%)            |
| Second trimester                                  | 5 (8%)               | 11 (11.5%)          |
| Third trimester                                   | 7 (11.2%)            | 2 (2%)              |
| Not pregnant                                      | 50 (80.6%)           | 81 (84.3%)          |
| <b>Lactation</b>                                  |                      |                     |
| Still lactating                                   | 48 (77.4%)           | 81 (84.4%)          |
| Not lactating                                     | 3 (4.8%)             | 2 (2%)              |
| Not applicable                                    | 10 (16.1%)           | 13 (13.5%)          |
| <b>Women with Children aged between 1 &amp; 2</b> | 23 (37%)             | 24 (25%)            |
| <b>Education level (%)</b>                        |                      |                     |
| None                                              | 3 (4.9%)             | 10 (10.5%)          |
| <PSLCE                                            | 40 (64.5%)           | 71 (74%)            |



|                         |            |            |
|-------------------------|------------|------------|
| PSLCE                   | 11 (17.7%) | 9 (9.4%)   |
| JCE                     | 7 (11.3%)  | 3 (3%)     |
| MSCE                    | 1(1.6%)    | 3 (3.1%)   |
| <b>Source of income</b> |            |            |
| Formal employment       | 4 (6.5%)   | 3 (3.1%)   |
| Farming                 | 44 (71%)   | 80 (83.3%) |
| Business                | 9 (14.5%)  | 6 (6.3%)   |
| Peace work              | 5 (8%)     | 5 (5.2%)   |

155 \*Values are mean with standard deviation

156

157 The cool dry winter season had more variety of foods available as compared to the other seasons.  
 158 This is because the cool dry winter season coincides with the crop harvest period, and food is  
 159 readily available through own farms production. However, when the stocks run dry, the  
 160 households become dependent on purchase [4]. On the other hand, daily meal frequency reduced  
 161 in cool dry winter season from 3 to 2 meals per day in the hot dry season and 1 meal per day in  
 162 warm wet season respectively. Similar meal frequencies were reported in Lilongwe district of  
 163 Malawi, where meal frequency was higher (3 meals per day) immediately after harvest than during  
 164 pre-harvest period (1 meal per day) [20]. Similarly in Mwense district of Zambia, meal frequency  
 165 for infants reduced from four to one or two meal per day with change in season [8].

166 In both districts, maize was the main staple food and it was adequately available all year round  
 167 (Table 2). This is because maize is a dominant staple food for Malawi supplying more than 54%  
 168 of the food calories [21]. Common beans were the most common legume in both districts, and  
 169 were mostly grown in Dedza, while Balaka was a net importer. Legumes grown in Dedza and  
 170 Balaka were for subsistence and cash crop, however priority was for cash. Economic necessities

171 rather than own consumption preference influence cultivation and sale of food crops. Households  
 172 sale portions of their harvest in order to buy chemical fertilizers and to meet costs for clothing,  
 173 schooling, medical services, transport and maize milling” [22]. Vegetables were least available  
 174 during the hot dry season. In a trials of improved practice (TIPs) study, Malawian mothers raised  
 175 a general concern that lack of vegetables in the dry season was one of the reasons that made it  
 176 difficult to adhere to counseling messages for child feeding [8]. In order to improve year-round  
 177 availability of vegetables, most of the households preserved leafy vegetables through direct sun  
 178 drying. In times of plenty, vegetables are made in part imperishable by blanching and drying and  
 179 are stored in traditional storage bags called “zikwatu” for future use [22] [24]. Unfortunately, sun  
 180 drying exposes the food directly to the sun, compromising nutrient retention and hygiene as  
 181 opposed to solar drying [23]. On the other hand indigenous vegetables were more adequately  
 182 available in the warm wet season. Another study supports, that indigenous vegetables are abundant  
 183 during the rainy season, where they grow around family homesteads [24].

184

185 **Table 2: Foods available in Balaka and Dedza districts at different seasons**

| Name of food                                 | District | Seasons  |    |   |    |    |    |                 |    |    |    |         |    |
|----------------------------------------------|----------|----------|----|---|----|----|----|-----------------|----|----|----|---------|----|
|                                              |          | Warm wet |    |   |    |    |    | Cool dry winter |    |    |    | Hot dry |    |
|                                              |          | N        | D  | J | F  | M  | A  | M               | J  | J  | A  | S       | O  |
| <b>STAPLES</b>                               |          |          |    |   |    |    |    |                 |    |    |    |         |    |
| Maize<br><i>(Zea mays)</i>                   | Balaka   | M        | M  | M | FM | FM | FM | FM              | FM | FM | FM | M       | M  |
|                                              | Dedza    | FM       | FM | M | M  | FM | FM | FM              | FM | FM | FM | FM      | FM |
| Irish potatoes<br><i>(Solanum tuberosum)</i> | Balaka   | M        | M  | M | M  | M  | M  | M               | M  | M  | M  | M       | M  |
|                                              | Dedza    | M        | M  | M | M  | M  | FM | FM              | FM | FM | FM | FM      | FM |

| Name of food                                        | District | Seasons  |    |    |    |    |    |                 |    |    |    |         |    |
|-----------------------------------------------------|----------|----------|----|----|----|----|----|-----------------|----|----|----|---------|----|
|                                                     |          | Warm wet |    |    |    |    |    | Cool dry winter |    |    |    | Hot dry |    |
|                                                     |          | N        | D  | J  | F  | M  | A  | M               | J  | J  | A  | S       | O  |
| Sweet potatoes<br><i>(Ipomoea batatas)</i>          | Balaka   | M        | M  |    |    | FM | FM | FM              | FM | FM | FM | M       | M  |
|                                                     | Dedza    |          |    |    |    | FM | FM | FM              | FM | FM | FM | FM      |    |
| Cassava<br><i>(Manihot esculenta)</i>               | Balaka   | M        | M  | M  | M  | M  | FM | FM              | FM | FM | FM | M       | M  |
|                                                     | Dedza    | FM       | FM | FM | FM | FM |    |                 |    |    | FM |         |    |
| Rice<br><i>(Oryza sativa)</i>                       | Balaka   | M        | M  | M  | M  | M  | M  | M               | M  | M  | M  | M       | M  |
|                                                     | Dedza    | M        | M  | M  | M  | M  | M  | M               | M  | M  | M  | M       | M  |
| <b>LEGUMES</b>                                      |          |          |    |    |    |    |    |                 |    |    |    |         |    |
| Soya beans<br><i>(Glycine max)</i>                  | Balaka   |          |    |    |    | FM | FM | FM              | FM | FM | FM |         |    |
|                                                     | Dedza    | M        | M  | M  | M  | M  | F  | F               | F  | FM | FM | FM      | M  |
| Dry pigeon peas<br><i>(Cajanus cajan)</i>           | Balaka   | FM       | FM | FM | FM | FM | F  | F               | FM | FM | FM | FM      | FM |
|                                                     | Dedza    |          |    |    |    |    |    |                 |    |    |    |         |    |
| Dry common bean<br><i>(Phaseolus spp)</i>           | Balaka   | M        | M  | M  | M  | M  | M  | M               | M  | M  | M  | M       | M  |
|                                                     | Dedza    | FM       | M  | M  | M  | F  | F  | FM              | FM | FM | FM | FM      | FM |
| <b>VEGETABLES</b>                                   |          |          |    |    |    |    |    |                 |    |    |    |         |    |
| Cabbage<br><i>(Brassica oleracea var. capitata)</i> | Balaka   | M        | M  | M  | M  | M  | M  | M               | M  | M  | M  | M       | M  |
|                                                     | Dedza    | M        | M  | M  | M  | M  | FM | FM              | FM | FM | M  | M       | M  |
| Rape<br><i>(Brassica napus var. oleifera)</i>       | Balaka   | M        | M  | M  | M  | M  | FM | FM              | FM | FM | FM | M       | M  |
|                                                     | Dedza    | M        | M  | M  | M  | M  | FM | FM              | FM | FM | FM | M       | M  |
| Mustard Indian<br><i>(Brassica juncea)</i>          | Balaka   | M        | M  | M  | M  | M  | M  | M               | M  | M  | M  | M       | M  |
|                                                     | Dedza    | M        | M  | M  | M  | M  | FM | FM              | FM | FM | FM | M       | M  |
| Sweet potato leaves<br><i>(Ipomoea batatas)</i>     | Balaka   | F        | F  | F  | F  | F  | F  | F               | F  | F  | F  | F       | F  |
|                                                     | Dedza    | F        | F  | F  | F  | F  | F  | F               | F  | F  | F  | F       | F  |
| Pumpkin leaves<br><i>(Cucurbita species)</i>        | Balaka   | M        | M  | F  |    | F  | F  | F               | FM | FM | FM | M       | M  |
|                                                     | Dedza    | FM       | FM | F  | F  | F  | F  | F               | FM | FM | FM | FM      | FM |

| Name of food                                                      | District | Seasons  |   |   |    |    |    |                 |    |    |    |         |    |
|-------------------------------------------------------------------|----------|----------|---|---|----|----|----|-----------------|----|----|----|---------|----|
|                                                                   |          | Warm wet |   |   |    |    |    | Cool dry winter |    |    |    | Hot dry |    |
|                                                                   |          | N        | D | J | F  | M  | A  | M               | J  | J  | A  | S       | O  |
| Cassava leaves<br><i>(Manihot esculenta)</i>                      | Balaka   | F        | F | F | F  | F  | F  | F               | F  | F  | F  | F       | F  |
|                                                                   | Dedza    | F        | F | F | F  | F  | F  | F               | F  | F  | F  | F       | F  |
| Amaranth<br><i>(Amaranthus hybridus)</i>                          | Balaka   | M        | F | F | F  | F  | F  | FM              | FM | FM | FM |         | M  |
|                                                                   | Dedza    | F        | F | M | F  | F  | FM | FM              | FM | M  | M  | M       | M  |
| Blackjack<br><i>(Bidens pilosa)</i>                               | Balaka   |          | F | F | F  | F  | F  | F               | F  | F  |    |         |    |
|                                                                   | Dedza    | M        | M | M | M  | M  | M  | M               | M  | FM | FM | FM      | FM |
| Ye-be<br><i>(Cardeauxia edulis)</i>                               | Balaka   |          | F | F | F  | F  | F  | F               | F  |    |    |         |    |
|                                                                   | Dedza    |          | F | F | F  | F  | FM | FM              |    |    |    |         |    |
| Sweet corn<br><i>(Zea mays)</i>                                   | Balaka   | M        | M |   | F  | F  | F  | FM              | FM | M  | M  | M       | M  |
|                                                                   | Dedza    | M        | M |   | F  | F  | F  | F               | FM | FM | FM | M       | M  |
| Tomato<br><i>(Lycopersican esculentum)</i>                        | Balaka   | M        | M | M | M  | M  | M  | M               | M  | M  | M  | M       | M  |
|                                                                   | Dedza    | M        | M | M | M  | M  | M  | M               | M  | M  | M  | M       | M  |
| Okra<br><i>(Hibiscus esculentus)</i>                              | Balaka   | M        | M |   | M  | FM | F  | F               | F  | FM | FM |         | M  |
|                                                                   | Dedza    | M        | M | M | FM | FM | FM | FM              | FM | FM | M  | M       | M  |
| Onion<br><i>(Allium cepa)</i>                                     | Balaka   | M        | M | M | M  | M  | M  | M               | M  | M  | M  | M       | M  |
|                                                                   | Dedza    | M        | M | M | M  | M  | M  | M               | M  | M  | M  | M       | M  |
| <b>ANIMAL PRODUCTS</b>                                            |          |          |   |   |    |    |    |                 |    |    |    |         |    |
| <i>Usipa/Bonya</i> fish<br><i>(Engraulicypris sardella-Large)</i> | Balaka   | M        | M | M | M  | M  | M  | M               | M  | M  | M  | M       | M  |
|                                                                   | Dedza    | M        | M | M | M  | M  | M  | M               | M  | M  | M  | M       | M  |
| Cat fish- <i>Mlamba/Anjolinjo</i><br><i>(Clarias gariepinus)</i>  | Balaka   | M        | M | M | M  | M  | M  | M               | M  | M  | M  | M       | M  |
|                                                                   | Dedza    | M        | M | M | M  | M  | M  | M               | M  | M  | M  | M       | M  |
| <i>Utaka</i><br><i>(Copadichromis, Otopharynx)</i>                | Balaka   | M        | M | M | M  | M  | M  | M               | M  | M  | M  | M       | M  |
|                                                                   | Dedza    | M        | M | M | M  | M  | M  | M               | M  | M  | M  | M       | M  |
| <i>Micheni</i>                                                    | Balaka   |          |   | M | M  | M  | M  | M               | M  | M  | M  | M       | M  |

| Name of food                             | District | Seasons  |    |    |    |    |    |                 |    |    |    |         |    |
|------------------------------------------|----------|----------|----|----|----|----|----|-----------------|----|----|----|---------|----|
|                                          |          | Warm wet |    |    |    |    |    | Cool dry winter |    |    |    | Hot dry |    |
|                                          |          | N        | D  | J  | F  | M  | A  | M               | J  | J  | A  | S       | O  |
| <i>(Rhamphochromis sp.)</i>              | Dedza    | M        | M  | M  | M  | M  | M  | M               | M  | M  | M  | M       | M  |
| <i>Matemba<br/>(Barbus paludinosus)</i>  | Balaka   | M        | M  | M  | M  | M  | M  | M               | M  | M  | M  | M       | M  |
|                                          | Dedza    | M        | M  | M  | M  | M  | M  | M               | M  | M  | M  | M       | M  |
| Chicken                                  | Balaka   | FM       | FM | FM | FM | FM | FM | FM              | FM | FM | FM | FM      | FM |
|                                          | Dedza    | FM       | FM | FM | FM | FM | FM | FM              | FM | FM | FM | FM      | FM |
| Eggs                                     | Balaka   | FM       | FM | FM | FM | FM | FM | FM              | FM | FM | FM | FM      | FM |
|                                          | Dedza    | FM       | FM | FM | FM | FM | FM | FM              | FM | FM | FM | FM      | FM |
| Pork                                     | Balaka   | FM       | FM | FM | FM | FM | FM | FM              | FM | FM | FM | FM      | FM |
|                                          | Dedza    | FM       | FM | FM | FM | FM | FM | FM              | FM | FM | FM | FM      | FM |
| Goat Meat                                | Balaka   | FM       | FM | FM | FM | FM | FM | FM              | FM | FM | FM | FM      | FM |
|                                          | Dedza    | FM       | FM | FM | FM | FM | FM | FM              | FM | FM | FM | FM      | FM |
| Beef                                     | Balaka   |          |    | M  | M  | M  | M  | M               | M  | M  | M  |         |    |
|                                          | Dedza    |          |    | M  | M  | M  | M  | M               | M  | M  | M  |         |    |
| Cow milk                                 | Balaka   |          |    | M  |    |    | M  | M               | M  | M  | M  |         |    |
|                                          | Dedza    | M        | M  | M  | M  | M  | M  | M               | M  | M  | M  | M       | M  |
| <b>FRUITS</b>                            |          |          |    |    |    |    |    |                 |    |    |    |         |    |
| Jujube<br><i>(Ziziphus mauritiana)</i>   | Balaka   |          |    |    |    | FM | FM |                 | FM | FM | FM | FM      |    |
|                                          | Dedza    |          |    |    |    |    | FM | FM              | FM | FM | FM |         | FM |
| Baobab<br><i>(Adansonia digitata)</i>    | Balaka   |          |    |    |    | FM | FM | FM              | FM | FM |    |         |    |
|                                          | Dedza    |          |    |    |    | FM | FM | FM              |    |    |    |         |    |
| Ripe Bananas ( <i>Musa paradisiaca</i> ) | Balaka   | M        | M  | FM | FM | FM | FM | M               | M  | M  | M  | M       |    |
|                                          | Dedza    | M        | M  | FM | FM | FM | FM | FM              | FM | FM | FM | M       |    |
| Mangoes ( <i>Mangifera indica</i> )      | Balaka   | F        | F  | FM | FM |    |    |                 |    |    | FM | F       |    |
|                                          | Dedza    | F        | F  | F  |    | FM |    |                 |    |    | FM |         |    |

| Name of food                               | District | Seasons  |   |   |    |    |    |                 |    |    |    |         |    |
|--------------------------------------------|----------|----------|---|---|----|----|----|-----------------|----|----|----|---------|----|
|                                            |          | Warm wet |   |   |    |    |    | Cool dry winter |    |    |    | Hot dry |    |
|                                            |          | N        | D | J | F  | M  | A  | M               | J  | J  | A  | S       | O  |
| Guava ( <i>Psidium guajava</i> )           | Balaka   |          |   |   | FM | FM | FM | FM              | FM |    |    |         |    |
|                                            | Dedza    |          |   |   | FM | FM | FM | FM              | FM | FM |    |         |    |
| <b>OIL FOODS</b>                           |          |          |   |   |    |    |    |                 |    |    |    |         |    |
| Vegetable Cooking oil                      | Balaka   | M        | M | M | M  | M  | M  | M               | M  | M  | M  | M       | M  |
|                                            | Dedza    | M        | M | M | M  | M  | M  | M               | M  | M  | M  | M       | M  |
| Soya beans ( <i>Glycine max</i> )          | Balaka   |          |   |   |    | FM | FM | FM              | FM | FM | FM |         |    |
|                                            | Dedza    | M        | M | M | M  | M  | F  | F               | F  | FM | FM | FM      | M  |
| Dry groundnuts ( <i>Arachis hypogaea</i> ) | Balaka   | M        | M | M | M  | M  | FM | FM              | FM | FM | FM | M       | M  |
|                                            | Dedza    | FM       | M | M | M  | M  | F  | F               | F  | FM | FM | FM      | FM |
| Avocado pears ( <i>Persea americana</i> )  | Balaka   |          |   |   | M  | M  | M  | M               | M  | M  | M  |         |    |
|                                            | Dedza    |          |   |   |    | M  | M  | M               | M  | M  | M  |         |    |

186 Key: N- November, D- December, J- January, F- February, M-March, A- April, M- May, J-June, J-July, A- August, S- September, O- October

187 ■ Adequately available ■ Scarcely available ■ Not available

188 Source of food: (F) individual household farming; (M) purchase from the market; (FM) purchase from the market and individual household  
189 farming

190

191 Exotic vegetables, animal and oil foods, were predominantly obtained from the market in both  
192 districts, therefore consumption of these foods highly depends on financial resources of a  
193 household. Fish is the main source of animal protein for poor rural households in Malawi. Forty  
194 percent of the total protein supply comes from fish, which provides over 60% of dietary animal  
195 protein intake of Malawians [25]. Households involved in animal farming don't usually consume  
196 the animals that they farm, because animal farming has a prestigious value attached to it and most  
197 of the households would only consume their own animals during ceremonies. Consumption of

198 fruits was lower than that of vegetables and only half of all households in Malawi consume fruits  
199 [26]. A participant in Dedza mentioned that “*In Malawi, households do not usually grow fruits,*  
200 *most of the fruits that are available are naturally available in the communities*”. When it comes to  
201 government agricultural programs and extension workers expertise in Malawi, there is also a bias  
202 towards staple crops and cereals, with a small focus on horticulture and fruit tree production [27].  
203 On the other hand, vegetable-cooking oil was adequately available across all the seasons in both  
204 districts. One of the participants in Balaka mentioned that “*unlike some years back, with the*  
205 *awareness of the importance of inclusion of oil foods in the diet and the preferred taste of fried*  
206 *foods, most of the households now make sure that they cook meals using cooking oil for at least*  
207 *once a week*”. The participants also explained that most households can now afford cooking oil  
208 because vendors provide cooking oil in small sachets with a starting price of K50 (around 0.069\$)  
209 which is cheaper as compared to commercial packaging which starts from a 500ml bottle at  
210 MK750 (around 1\$).

211 A Malawian recommended diet comprising of six food groups was not observed among the study  
212 participants across all the seasons. A recommended diet for Malawians including pregnant and  
213 lactating women as well as children aged between 12 and 23 months, is a diet comprising of food  
214 from the six food groups of Malawi; staples, legumes, vegetables, animal products, fruits and oils  
215 [17]. Increasing the variety of foods across and within food groups is recommended to ensure  
216 adequate intake of essential nutrients that promote good health. However, diets comprising of at  
217 least four food groups which is considered acceptable, were observed in the warm wet season and  
218 hot dry season; “*vegetable, oil, staple, fish and legume based diet*” observed in Balaka in the warm  
219 wet season, “*vegetable, legume, oil, staple and fruit based diet*” observed in Balaka in the hot dry  
220 season and “*legume, fish, vegetable and staple based diet*” observed in Dedza in the hot dry season

221 (Table 3). Other studies in rural Malawi have reported that 33% of rural Malawians consumed  
 222 food from less than five out of the six food groups [4].

223

224 **Table 3: Summary of dietary patterns for pregnant and lactating women and children aged**  
 225 **between 6 and 23 months for Dedza and Balaka at different seasons**

| Warm wet Season                                |                                    | Cool dry winter Season               |                                 | Hot dry Season                                 |                                          |
|------------------------------------------------|------------------------------------|--------------------------------------|---------------------------------|------------------------------------------------|------------------------------------------|
| Balaka                                         | Dedza                              | Balaka                               | Dedza                           | Balaka                                         | Dedza                                    |
| Vegetable and fish based                       | Legume, oil and fish based         | Vegetable and snack based            | Animal, oil and vegetable based | Fish, vegetable and snack based*****           | Legume, fish, vegetable and staple based |
| Legume and vegetable based*                    | Staple, vegetable and snack based  | Staple and vegetable based***        | Snack based*****                | Vegetable, legume, oil, staple and fruit based | fish, snack, animal and oil based        |
| Vegetable, oil, staple, fish, and legume based | Animal, fruit and snack based      | Legume and vegetable based*          | Staple and vegetable based***   | Staple and snack based                         | Staple and vegetable based***            |
| Legume and snack based**                       | Vegetable based****                | Fish, vegetable and snack based***** | Legume and vegetable based*     | Animal based                                   | Staple and animal based*****             |
| Staple and fruit based                         | Legume, vegetable and staple based | Vegetable, oil and snack based       | Legume and snack based**        | Staple and vegetable based***                  | Vegetable based****                      |



---

|                                    |                        |                                                    |
|------------------------------------|------------------------|----------------------------------------------------|
| Staple and<br>animal<br>based***** | Vegetable<br>based**** | Staple and oil<br>based<br><br>Snack<br>based***** |
|------------------------------------|------------------------|----------------------------------------------------|

226 Dietary patterns that are reappearing between the districts and across the seasons have the same number of asterisks. Dietary patterns with at least  
227 four food groups have been highlighted.

228

229 Diets comprising of food made from at least four food groups were observed in the warm wet  
230 season and hot dry season, showing that malnutrition cases are more likely to increase in the cool  
231 dry winter season. This is contrary to expectation, since the cool dry season coincides with harvest  
232 time, when households had access to a variety of foods as indicated by the seasonal food  
233 availability calendars (Table 2). In ability to consume a balanced diet in the cool dry winter season  
234 may be due to a number of reasons. Inadequate nutrition knowledge among women and men  
235 farmers contributes to unbalanced nutrition in Malawi [22]. On the other hand, people's attitude  
236 towards health and nutrition advice also affects diet that is followed. In one study, 85.6% of the  
237 students were familiar with the concept of balance of nutrients in food, but only 7% of them used  
238 it in their diets [28]. Time is also a challenge, this being a harvest season, women are usually busy  
239 in the fields harvesting, hence they may not have adequate time to prepare nutritious meals. It  
240 should also be noted that food choices are largely driven by taste, cost, and convenience [29].  
241 Dietary guidelines tend to emphasize good nutrition, rarely taking food preferences, food prices,  
242 or diet costs into account. The ability to follow a healthy diet depends on having sufficient  
243 knowledge, money, and time, which low-income families often lack.

244 A brief overview shows that the constituents of the diets were food items that were adequately  
245 available in homes as compared to those that were adequately available at the market. In the warm  
246 wet season, 87% and 82% of the food that comprised the diets of Balaka and Dedza respectively  
247 were adequately available in the home, while in the cool dry winter season, 92% of the foods in  
248 Balaka diets and 74% of the food in the Dedza diets were adequately available. Likewise in the  
249 hot dry season 65% and 67% of the foods in the diets of Balaka and Dedza respectively were  
250 adequately available (Table 2 and 3). Several studies indicate existence of positive associations  
251 between food consumption and availability of foods in the home [30]. One study found that intakes  
252 of fruit and vegetables were positively associated with household availability and that consumption  
253 of milk increased when milk was available in the home [31]. Yet in another study, it was found  
254 that adolescents consumed less snacks and sweetened beverages when these foods were not  
255 available in the home [32].

256 In conclusion, the findings of the present study supported by other studies, has revealed that  
257 nutrition knowledge is essential to achieving adequate food utilization. That home food  
258 availability is associated with consumption patterns as opposed to market food availability, which  
259 is entangled with issues of accessibility. Enhancing the nutrition attitudes, knowledge and  
260 practices of people is important because this would lead to more food-conscious society, which  
261 could be predisposing factors for improving eating habits and adopting a healthy diet. Simple  
262 messages on behavior change mechanisms on improving dietary pattern and provision of different  
263 types of recipes containing locally available foods will help households to make better food  
264 choices which could be a component of dietary change intervention.

## 265 **Acknowledgements**

266 The authors would like to thank Mr. Vincent Mlotha, for his assistance with data analysis, Mr.  
267 Clyde Kalima, for his assistance with development of maps and the participants, without whose  
268 cooperation this study would not have been a success.

## 269 **References**

- 270 1. Devereux S. Seasonality and Social Protection in Africa. *Future Agriculture*. 2009:011  
271 Available from: <http://opendocs.ids.ac.uk/opendocs/handle/123456789/2346>
- 272 2. Svesve B. Malawi vulnerability assessment committee livelihood baseline national  
273 overview report. Lilongwe: Malawi; 2015.
- 274 3. Asfaw S, McCarthy N, Lipper L, Arslan A, Cattaneo A and Kachul M. (2014). Climate  
275 variability adaptation strategies and food security in Malawi. 2014:14-08. Available from:  
276 <http://www.fao.org/climatechange/epic/en/>
- 277 4. Government of Malawi and World Food Program. Comprehensive food security and  
278 vulnerability analysis (CFSVA) and nutrition assessment. Lilongwe: Malawi; 2012.
- 279 5. Kigutha HN. Effects of season on household food security and the nutritional status of  
280 smallholder rural households in Nakuru district, Kenya. *Leiden African Studies Centre,*  
281 *Food and Nutrition Studies*. 1995:55. Available from: <http://hdl.handle.net/1887/495>
- 282 6. Cullen KW, Baranowski T, Rittenberry L, and Olvera N. Social-environmental influences  
283 on children's diets: results from focus groups with African-, Euro-and Mexican-American  
284 children and their parents. *Journal of Health education research*. 2000:15(5): 581-590.  
285 doi:10.1093/her/15.5.581.
- 286 7. Santiago-Torres M, Adams AK, Creel AL, LaRowe TL and Schoeller DA. Home food  
287 availability, parental dietary intake, and familial eating habits influence the diet quality of

- 288 urban Hispanic children. *Journal of Childhood Obesity*. 2014;10(5):408-415.  
289 doi:10.1089/chi.2014.0051.
- 290 8. Wijesinha-bettoni R, Kennedy G, Dirorimwe C and Muehlhoff E. Considering Seasonal  
291 Variations in Food Availability and Caring Capacity when Planning Complementary  
292 Feeding Interventions in Developing Countries. *International Journal of Child Health and*  
293 *Nutrition*. 2013; 2: 335–352.
- 294 9. Chikhungu LC and Madise NJ. Seasonal variation of child under nutrition in Malawi: is  
295 seasonal food availability an important factor? Findings from a national level cross-  
296 sectional study. *Journal of public health*, 2014;14:1146-1157. doi: 10.1186/1471-2458-14-  
297 1146.
- 298 10. FAO European Union Food Facility Project. Trials of improved Practices (TIPs) reference  
299 notes and tools. A manual for TIPs trainers and implementers. Rome: Italy; 2011.
- 300 11. Government of Malawi and FAO. Nutrition Capacity Assessment in Malawi Report.  
301 Lilongwe: Malawi; 2009.
- 302 12. Cromwell E and Kyegombe N. Food security options in Malawi: good neighbors make  
303 good friends? *Forum for Food Security in Southern Africa*. 2005;2 Available from:  
304 <http://www.odi.uk/food-security-forum>
- 305 13. National Statistical Office Malawi. 2015-16 Malawi Demographic and Health Survey.  
306 Zomba, Malawi, and Rockville, Maryland: USA; 2017.
- 307 14. Grantham-McGregor S, Cheung YB, Cueto S, Glewwe P, Richter L and Strupp B.  
308 Developmental potential in the first 5 years for children in developing countries. *Lancet*.  
309 2006;369:60-70. doi:10.1016/S0140-6736(07)60032-4.

- 310 15. Walker SP, Wachs TD, Gardner JM, Lozoff B, Wasserman GA, Pollitt E, et al.  
311 International Child development: risk factors for adverse outcomes in developing  
312 countries. *Lancet*. 2007; 369(9556):145-57. doi:10.1016/S0140-6736(07)60076-2.
- 313 16. Malawi meteorological services. Towards reliable, responsive and high quality weather  
314 and climate services in Malawi. 2006 Available from: <http://www.metmalawi.com>
- 315 17. Government of Malawi. Nutrition fact sheet. Office of the president and cabinet,  
316 department of nutrition, HIV and AIDS. Lilongwe: Malawi; 2007.
- 317 18. Mayzel M, Kachala F and Kerner B. Reaching out to Teen Mothers in Malawi. USAID.  
318 Lilongwe: Malawi; 2010.
- 319 19. Aslam M and Kingdom G. Parental education and child health - understanding the pathway  
320 of impact in Pakistan. *Journal of World Development*. 2012;40(10): 2014-2032. doi:  
321 10.1016/j.worlddev.2012.05.007.
- 322 20. Geresomo NC. Impact of model village extension approach on dietary practices and  
323 nutritional status of household members: A case of Lilongwe district. M.Sc. Thesis,  
324 Univeristy of Malawi: Bunda College of agriculture; 2004. Pp. 1-65.
- 325 21. Aberman N., Meerman J. and Benson T. Mapping the linkages between Agriculture, Food  
326 Security and Nutrition in Malawi. International food policy research institute (IFPRI).  
327 2015.
- 328 Available from : <http://ebrary.ifpri.org/cdm/ref/collection/p15738coll2/id/129897>
- 329 22. Gronemeyer R, Fink M and Metzger J. Maize and malnutrition in Malawi: A study of the  
330 social-economic causes of unbalanced food cropping in Dedza and Salima Districts. GIZ:  
331 Maize and Malnutrition in Malawi; 2015. Pp. 1-63.

- 332 23. Singh H, Chaurasia PBL, Kumar A, Singh HK and SK Singh. Comparative study of solar  
333 drying of vegetables and spice materials with open sun drying. International journal of  
334 science, engineering and technology 2014:2:2348-4098.
- 335 24. Chadha ML, Oluoch MO, Saka AR, Mtukuso AP and Daudi AT. Vegetable research and  
336 development in Malawi: Review and planning workshop proceedings. The World  
337 Vegetable Center. Lilongwe: Malawi; 2003.
- 338 25. Phiri LY, Dzanja J, Kakota T and Hara M. Value chain analysis of Lake Malawi fish: A  
339 case study of *Oreochromis* spp (Chambo). International journal of Business and Social  
340 Science. 2013:4(2): 170-181.
- 341 26. Ruel MT. Is dietary diversity an indicator of food security or dietary quality? A review of  
342 measurement issues and research needs. International Food Policy Research Institute,  
343 Washington D.C. 2002:140.
- 344 27. Faulkner L, Harrington J, Levy D. and The K. Commercial opportunities for fruit in  
345 Malawi. World Agroforestry Centre. 2009:86. Available from :  
346 <http://www.worldagroforestry.org>
- 347 28. Robinson-O'Brien R, Larson N, Neumark-Sztainer D, Hannan P and Story M.  
348 Characteristics and dietary patterns of adolescents who value eating locally grown, organic,  
349 non-genetically engineered and no processed food. Journal of Nutrition Education and  
350 Behavior. 2009:41(1): 11-8. doi: 10.1016/j.jneb.2008.03.007.
- 351 29. Kapila RM, Rathnayaka T and Wang Z. Influence of family status on the dietary patterns  
352 and nutritional levels of children. Journal of Food and Nutrition Sciences. 2012:3: 1055-  
353 1059. doi: 10.4236/fns.2012.38140.

- 354 30. Nepper MJ and Chai W. Associations of the home food environment with eating behaviors  
355 and eight status among children and adolescents. *Journal of Nutrition and Food Science*.  
356 2015;12:1-4. doi: 10.4172/2155-9600.S12-004.
- 357 31. Hanson NI, Neumark-Sztainer D, Eisenberg ME, Story M and Wall M. Associations  
358 between parental report of the home food environment and adolescent intakes of fruits,  
359 vegetables and dairy foods. *Journal of Public Health Nutrition*. 2005;8: 77-85. doi:  
360 10.1079/PHN2004661.
- 361 32. Luszczynska A, Wit JBF, Vet E, Januszewicz A, Liszewska N, Johnson F, et al. At-home  
362 environment, out-of-home environment, snacks and sweetened beverages intake in  
363 preadolescence, early and mid-adolescence: The interplay between environment and self-  
364 regulation. *Journal of Youth Adolescence*. 2013;42:1873-1883. doi: 10.1007/s10964-013-  
365 9908-6.

bioRxiv preprint doi: <https://doi.org/10.1101/607606>; this version posted April 12, 2019. The copyright holder for this preprint (which was not certified by peer review) is the author/funder, who has granted bioRxiv a license to display the preprint in perpetuity. It is made available under aCC-BY 4.0 International license.

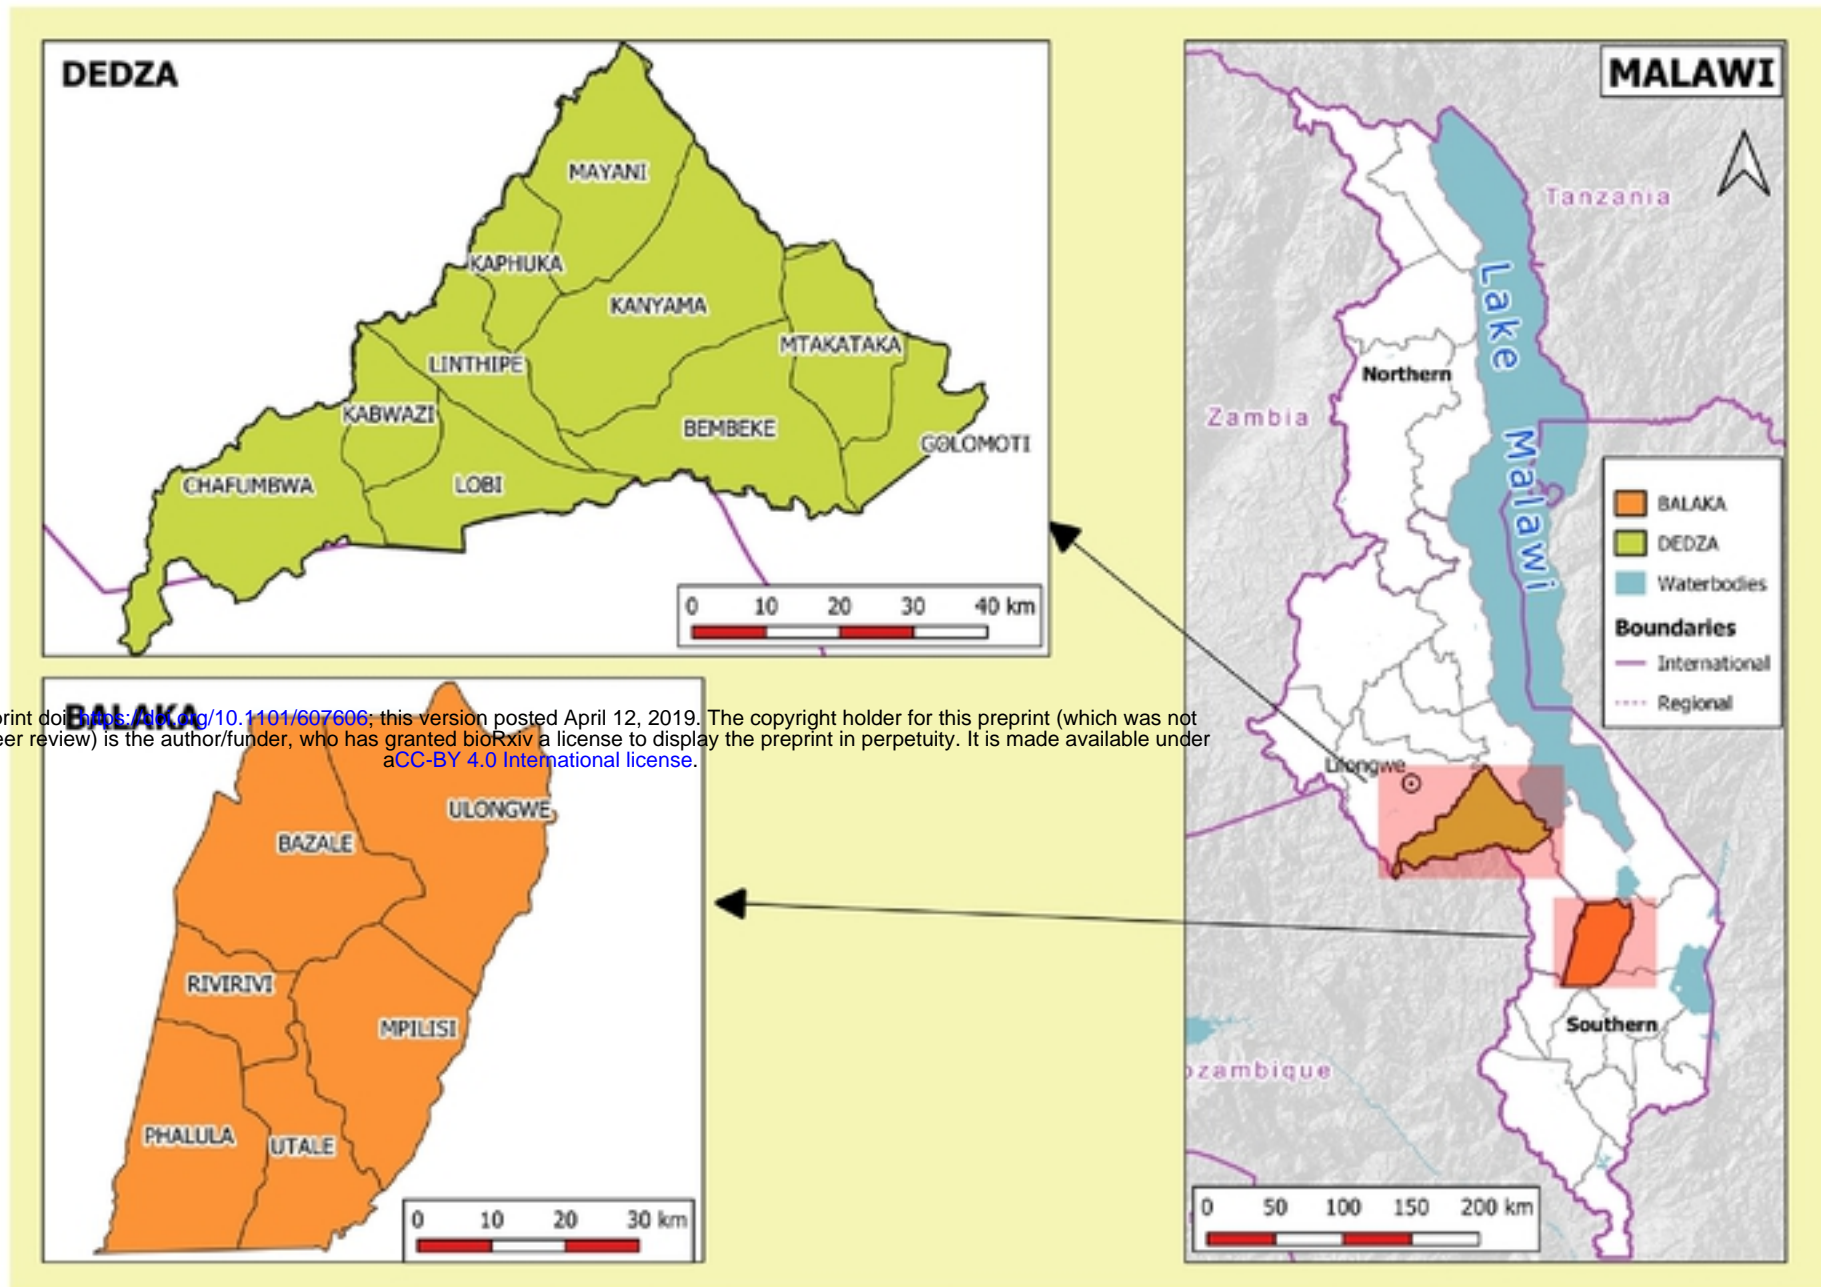

1  
2

**Figure 1: Map of Dedza and Balaka districts showing Extension Planning Areas**
